# Supplementary material
Source: PubMed Central journal article supplement (PMC7456252)
Supplement: jci-130-138448-s199.pdf [file jci-130-138448-s199.pdf]

## Supplementary Tables and Figures

**Supplemental Table 1: Antibodies used for flow cytometry**

|                                                                                             | Clone  | Fluorophore<br>Conjugation | Source                  |
|---------------------------------------------------------------------------------------------|--------|----------------------------|-------------------------|
| <b>Antibodies for SDMC surface marker upregulation</b>                                      |        |                            |                         |
| Anti-human CD117 (c-Kit)                                                                    | YB5.B8 | APC                        | BD Biosciences          |
| Anti-human CD203c                                                                           | NP4D6  | PE-Cy7                     | Biolegend               |
| Anti-human CD107a (LAMP1)                                                                   | H4A3   | PE                         | Invitrogen              |
| <b>Antibodies for NSG-SGM3 humanized mouse engraftment analysis</b>                         |        |                            |                         |
| Anti-mouse CD45                                                                             | 30-F11 | AF700                      | Biolegend               |
| Anti-human CD45                                                                             | 2D-1   | FITC                       | Biolegend               |
| Anti-human CD3                                                                              | OKT3   | PerCP-Cy5.5                | Biolegend               |
| Anti-human CD19                                                                             | HIB19  | PerCP-Cy5.5                | Biolegend               |
| Anti-human CD14                                                                             | 63D3   | APC-Cy7                    | Biolegend               |
| Anti-human CD203c                                                                           | NP4D6  | PE-Cy7                     | Biolegend               |
| Anti-mouse Siglec F                                                                         | W6D3   | PE                         | Becton Dickinson        |
| Anti-Siglec-8                                                                               | 2C4    | AF647                      | Conjugated in-house (1) |
| <b>Antibodies for NSG-SGM3 humanized mouse dispersed tissue-resident mast cell analysis</b> |        |                            |                         |
| Anti-mouse CD117 (c-Kit)                                                                    | 2B8    | FITC                       | eBioscience             |
| Anti-mouse CD45                                                                             | 30F16  | PE-Cy7                     | Biolegend               |
| Anti-mouse FcεRI                                                                            | MAR-1  | BV421                      | eBioscience             |
| Anti-human CD45                                                                             | HI30   | AF700                      | Biolegend               |
| Anti-human FcεRI                                                                            | AER-37 | APC-Cy7                    | Biolegend               |
| Anti-human CD117 (c-Kit)                                                                    | A3C6E2 | PerCP-Cy5.5                | Biolegend               |
| Anti-Siglec-8                                                                               | 2C4    | AF647                      | Conjugated in-house (1) |

**Supplemental Figure 1: Human skin-derived mast cell (SDMC) cultures.** Human SDMCs were isolated from normal skin fragments as described. After 4 weeks in culture, SDMCs from each donor consistently showed 70-90% purity as assessed by human CD45 (hCD45), cKit (hcKit) and FcεRI (hFcεRI) expression by flow cytometry. CD203c (hCD203c) and Siglec-8 expression were also analyzed. Plots are representative of three separate experiments.

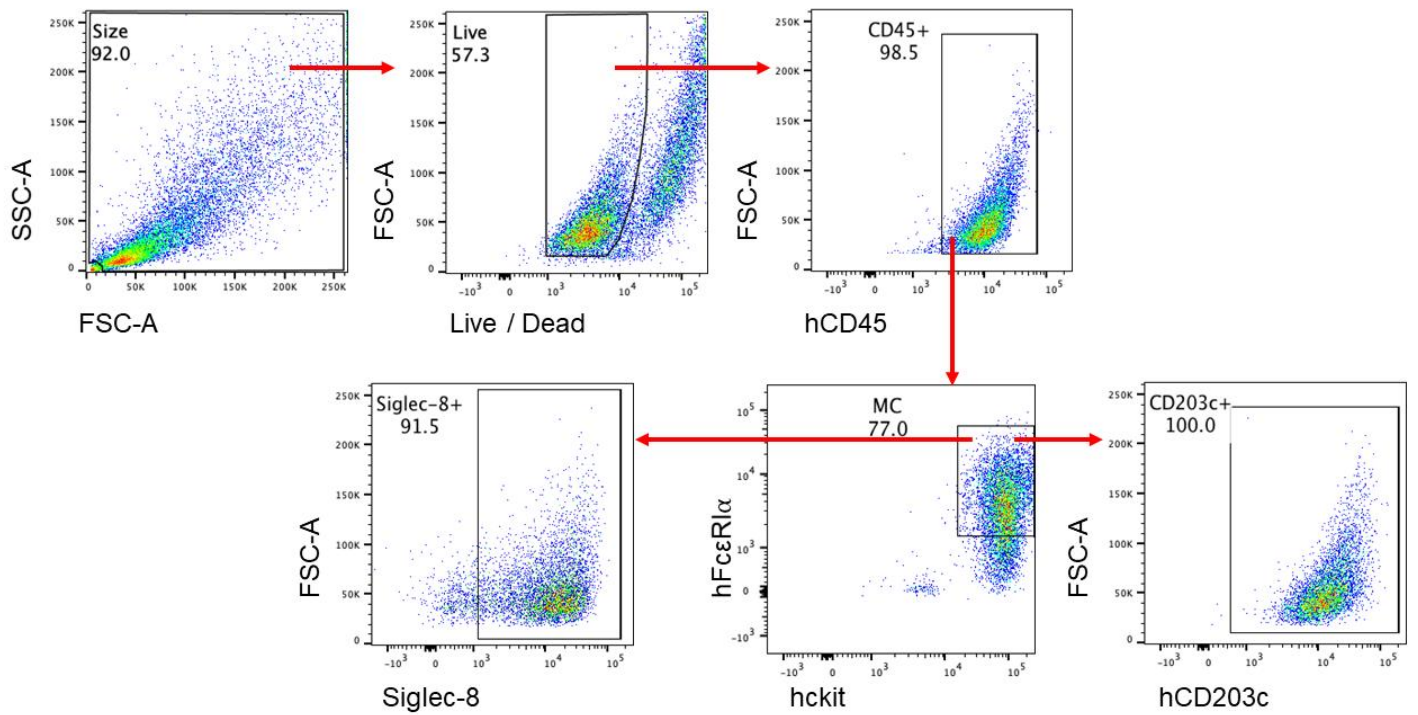

**Supplemental Figure 2: Gating strategy for engraftment analysis of humanized mice.** Whole blood from engrafted NSG-SGM3 mice was obtained at specific time points after HSC injection, labeled with fluorescently-conjugated antibodies for both murine and human markers, and analyzed by flow cytometry. Cells were first gated on forward and side scatter parameters to isolate single cells, then Aqua Fluorescent Reactive Dye (Invitrogen) was used to gate on live cells. Cells were then further gated on human CD45 (hCD45) or murine CD45 (mCD45) expression. Human mast cell and basophil progenitors were analyzed by gating on hCD45+ CD3- CD19- CD14- CD15- Siglec-8+ CD203c+ cells.

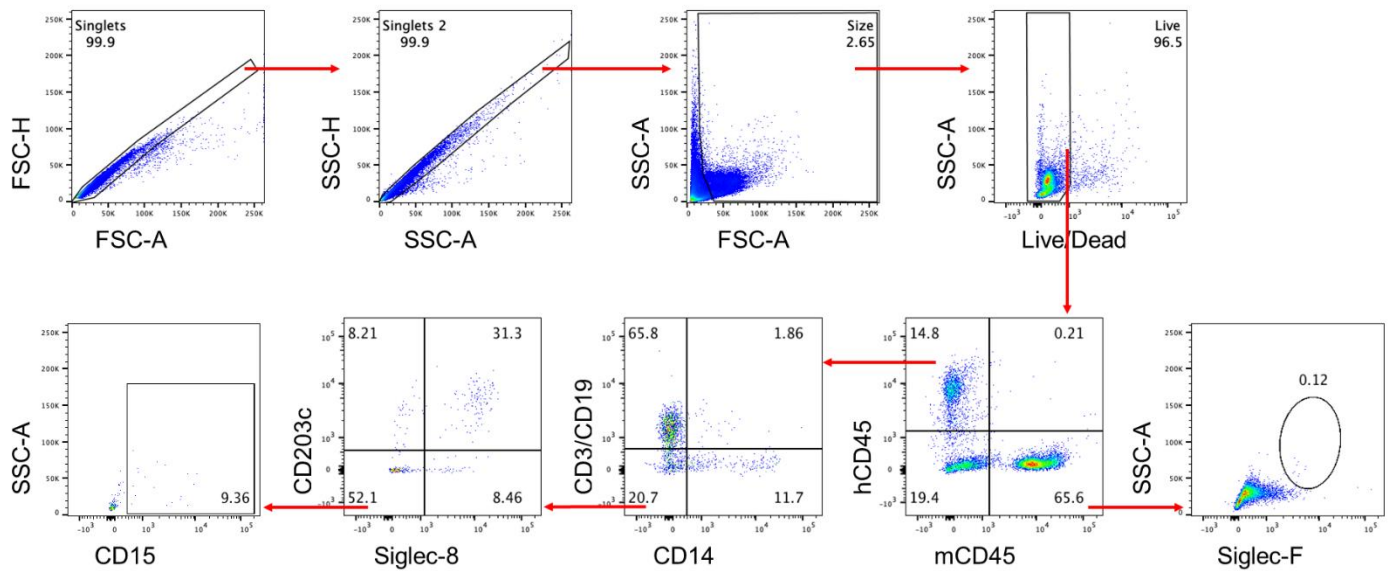

**Supplemental Figure 3: Gating strategy for analysis of tissue-resident mast cells in humanized mice after HSC engraftment.** Engrafted NSG-SGM3 mice were sacrificed 16 weeks after HSC injection. Indicated tissues were harvested, processed as described to generate single cell suspensions, and then labeled with fluorescently-conjugated antibodies for various murine and human markers for analysis by flow cytometry. Cells were first gated on forward and side scatter parameters to isolate single cells, then Aqua Fluorescent Reactive Dye (Invitrogen) was used to gate on live cells. Cells were then further gated on human CD45 (hCD45) or murine CD45 (mCD45) expression. Human mast cells were analyzed by gating on hCD45+ hKit+ hFcεRI+ Siglec-8+ cells.

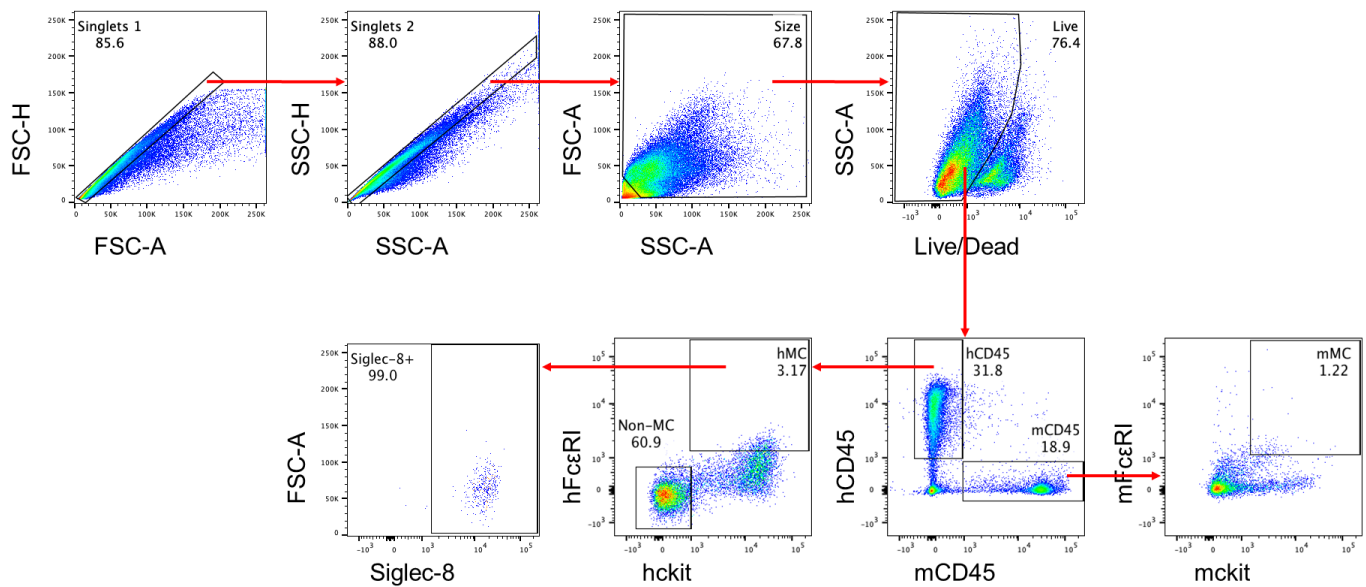

**References:**

1. Kikly KK, Bochner BS, Freeman SD, Tan KB, Gallagher KT, D'Alessio K J, et al. Identification of SAF-2, a novel siglec expressed on eosinophils, mast cells, and basophils. *J Allergy Clin Immunol.* 2000;105(6 Pt 1):1093-100.
